# Supplementary material for: The reliability of the modified Manual Muscle Test for persons with MS
Source: Research Square preprint supplement (doi:10.21203/rs.3.rs-7576603/v1), 2025-11-04
Supplement: Supplementary file 1 [file 15c230ecbee0cbe60c036034.docx]

**Appendix D Exploring the relationships between mMMT and fatigue resp. spasticity.**

Exploring the relationships between the overall mMMT and fatigue (NRS), between the overall mMMT score and the overall spasticity (MTS) scores, and between the mMMT foot score and the spasticity foot score for test and retest with linear mixed-effects models, including random intercepts for rater and participant. Regression coefficients with 95% confidence interval and P value are reported.

Table 6: mMMT overall by fatigue (NRS) and test type (test vs. retest).

|  | estimate | p |
| --- | --- | --- |
| Intercept | 31.62 [26.07, 37.17] | <0.001 |
| NRS fatigue | -0.15 [-0.52, 0.21] | 0.403 |
| Retest vs. Test | -0.86 [-2.15, 0.42] | 0.189 |

Table 7: mMMT overall by spasticity (modified Tardieu Scale, sum score) and test type (test vs. retest).

|  | estimate | p |
| --- | --- | --- |
| Intercept | 31.41 [25.74, 37.08] | <0.001 |
| Modified Tardieu Scale (sum score) | -0.04 [-0.41, 0.32] | 0.8168 |
| Retest vs. Test | -1.27 [-2.24, -0.30] | 0.0113 |

Table 8: mMMT foot by spasticity (modified Tardieu Scale, sum score) and test type (test vs. retest).

|  | estimate | p |
| --- | --- | --- |
| Intercept | 10.27 [ 7.79, 12.74] | <0.001 |
| Modified Tardieu Scale foot (sum score) | -0.02 [-0.28, 0.23] | 0.855 |
| Retest vs. Test | -0.41 [-0.95, 0.13] | 0.137 |
