# Supplementary material for: The reliability of the modified Manual Muscle Test for persons with MS
Source: Research Square preprint supplement (doi:10.21203/rs.3.rs-7576603/v1), 2025-11-04
Supplement: Supplementary file 1 [file 302fef724a6fc8fa6c223392.pdf]

## GRRAS checklist for reporting of studies of reliability and agreement

Version based on Table I in: Kottner J, Audigé L, Brorson S, Donner A, Gajewski BJ, Hróbjartsson A, Robersts C, Shoukri M, Streiner DL. Guidelines for reporting reliability and agreement studies (GRRAS) were proposed. J Clin Epidemiol. 2011;64(1):96-106

| Section            | Item # | Checklist item                                                                                                                              | Reported on page #    |
|--------------------|--------|---------------------------------------------------------------------------------------------------------------------------------------------|-----------------------|
| Title/Abstract     | 1      | Identify in title or abstract that interrater/intrarater reliability or agreement was investigated.                                         | 1, 2                  |
| Introduction       | 2      | Name and describe the diagnostic or measurement device of interest explicitly.                                                              | 2, 3, 4               |
|                    | 3      | Specify the subject population of interest.                                                                                                 | 3, 7 etc.             |
|                    | 4      | Specify the rater population of interest (if applicable).                                                                                   | Appendix B            |
|                    | 5      | Describe what is already known about reliability and agreement and provide a rationale for the study (if applicable).                       | 3, 4                  |
| Methods            | 6      | Explain how the sample size was chosen. State the determined number of raters, subjects/objects, and replicate observations.                | 6, 7, Appendix C      |
|                    | 7      | Describe the sampling method.                                                                                                               | Appendix C            |
|                    | 8      | Describe the measurement/rating process (e.g. time interval between repeated measurements, availability of clinical information, blinding). | 5, 6                  |
|                    | 9      | State whether measurements/ratings were conducted independently.                                                                            | 5,6                   |
|                    | 10     | Describe the statistical analysis.                                                                                                          | 7,8                   |
| Results            | 11     | State the actual number of raters and subjects/objects which were included and the number of replicate observations which were conducted.   | 8, 9, Appendix B      |
|                    | 12     | Describe the sample characteristics of raters and subjects (e.g. training, experience).                                                     | 4, Appendix B         |
|                    | 13     | Report estimates of reliability and agreement including measures of statistical uncertainty.                                                | 9 - 13                |
| Discussion         | 14     | Discuss the practical relevance of results.                                                                                                 | 14 - 19               |
| Auxiliary material | 15     | Provide detailed results if possible (e.g. online).                                                                                         | on reasonable request |
