# Supplementary material for: The reliability of the modified Manual Muscle Test for persons with MS
Source: Research Square preprint supplement (doi:10.21203/rs.3.rs-7576603/v1), 2025-11-04
Supplement: Supplementary file 2 [file 679db952ebfc854c465e9793.docx]

**Appendix D Relationships of the mMMT with testing time**


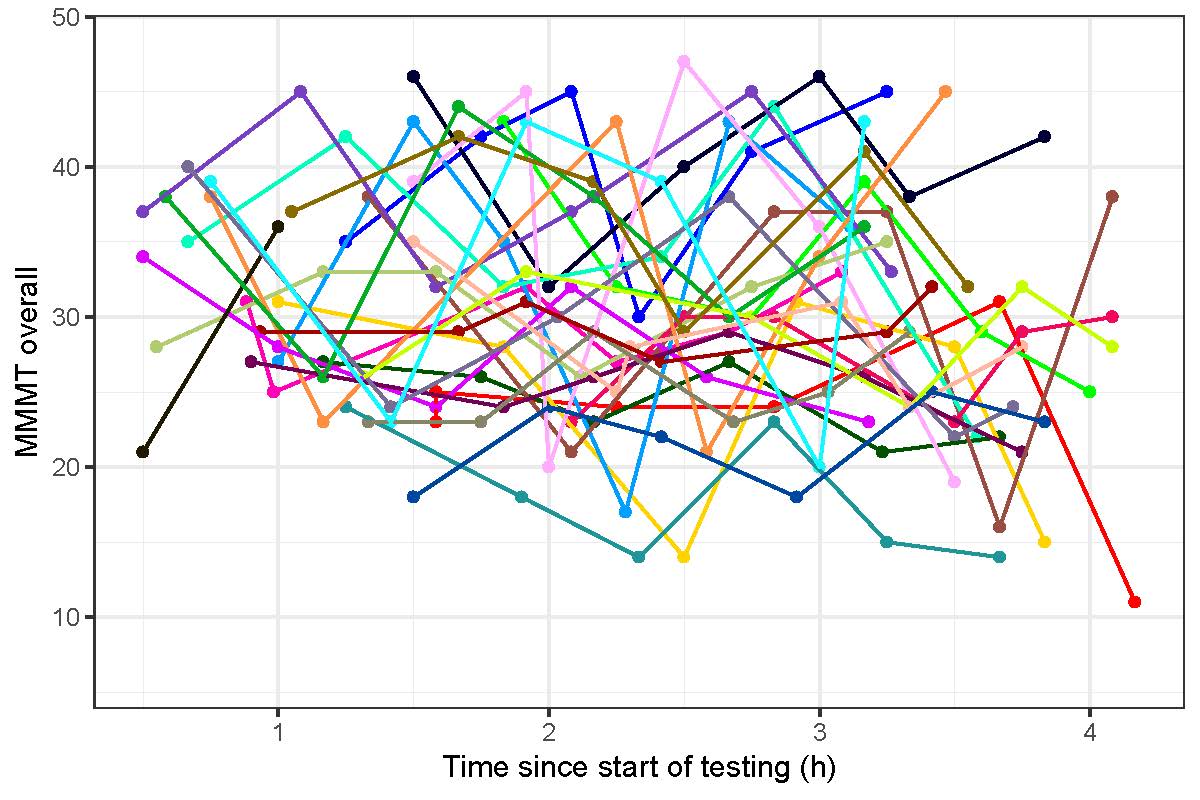
**Fig. 1.** Relationship between overall modified Manual Muscle Test (mMMT overall) score and testing time, i.e., time since start of testing (h). Each patient is represented by one line.


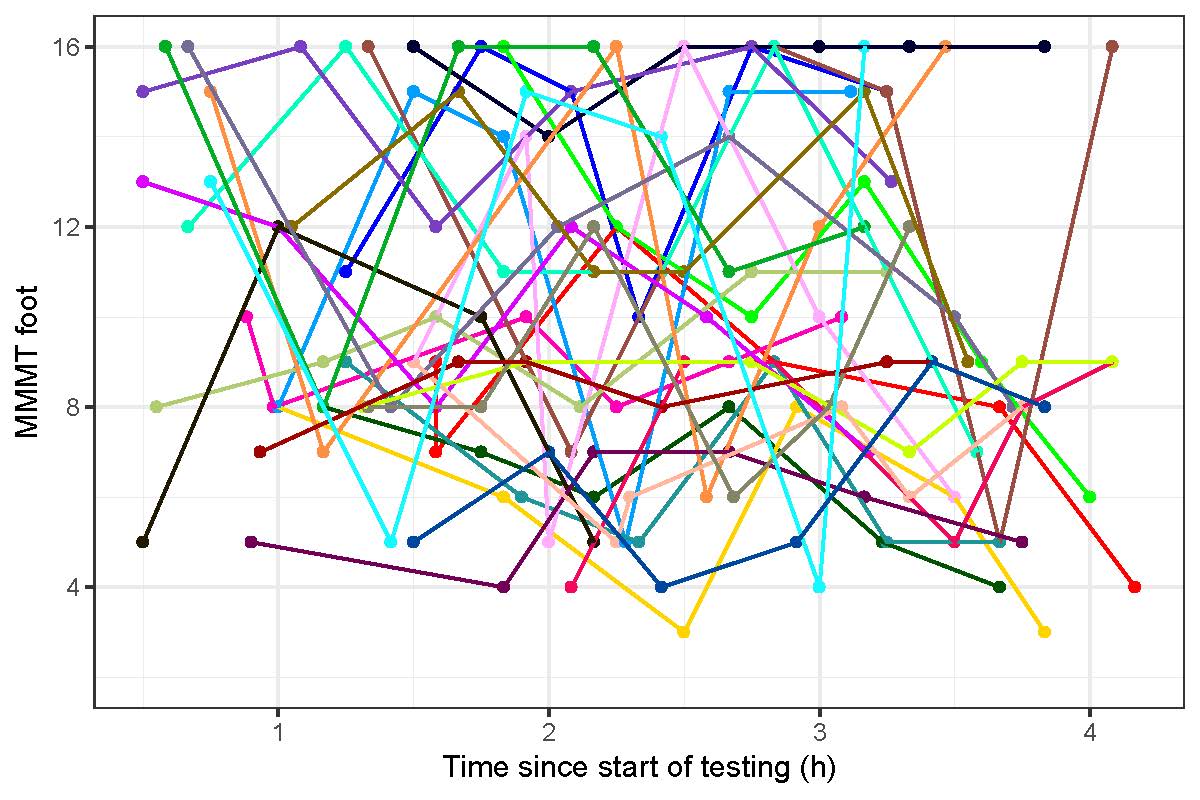
**Fig. 2.** Relationship between modified Manual Muscle Test (mMMT) foot score and testing time, i.e., time since start of testing (h). Each patient is represented by one line.


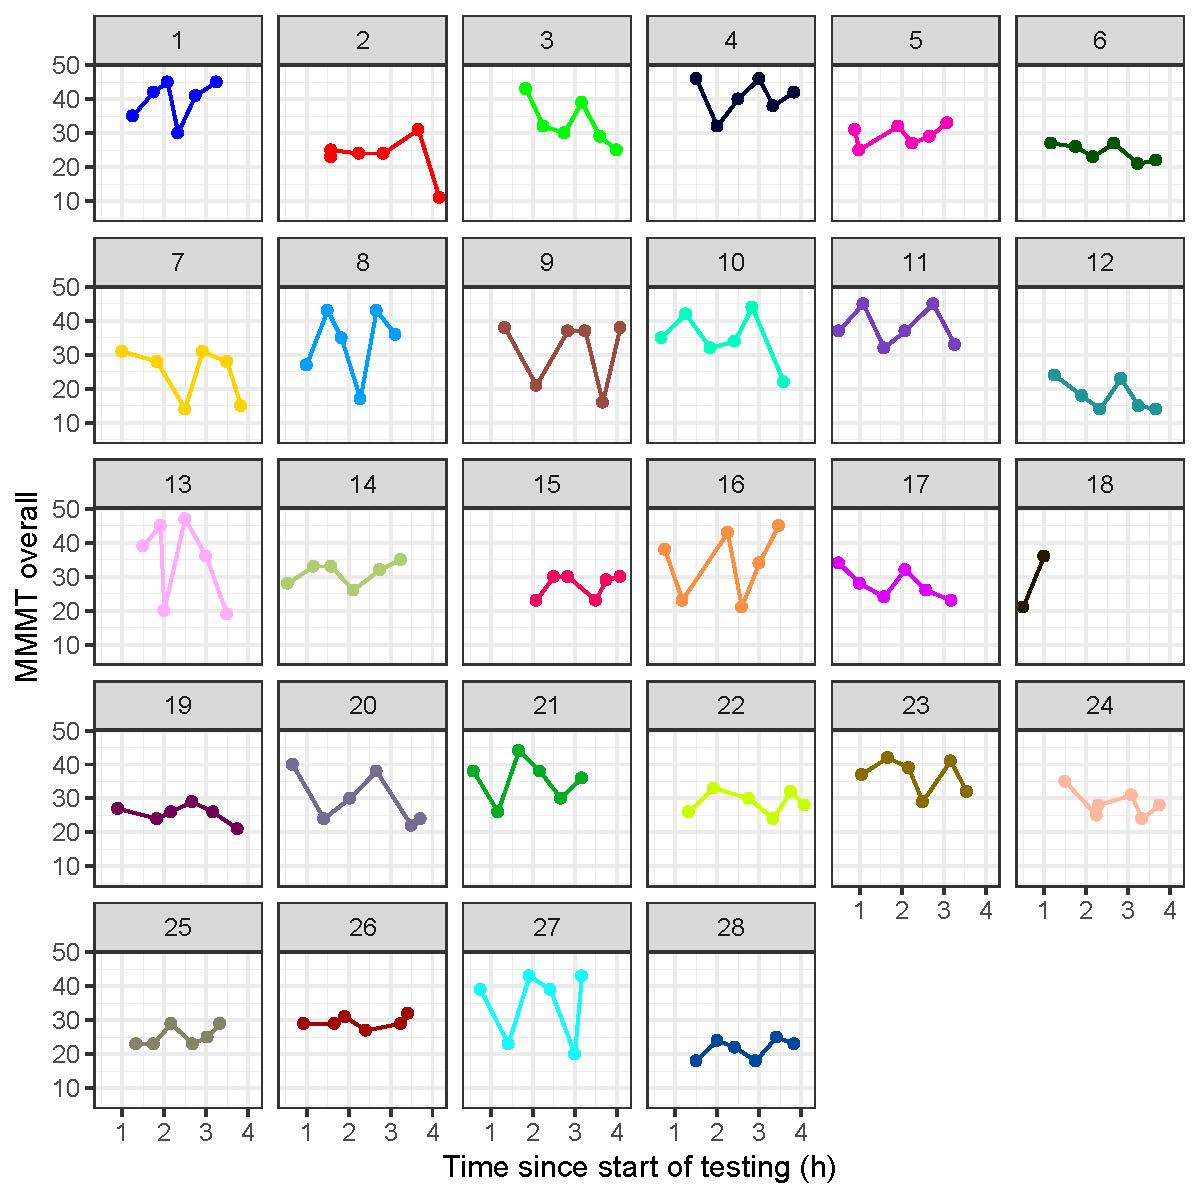


**Fig. 3.** Relationship between overall modified Manual Muscle Test (mMMT overall) score and testing time, i.e., time since start of testing (h). Each Plot represents one patient.


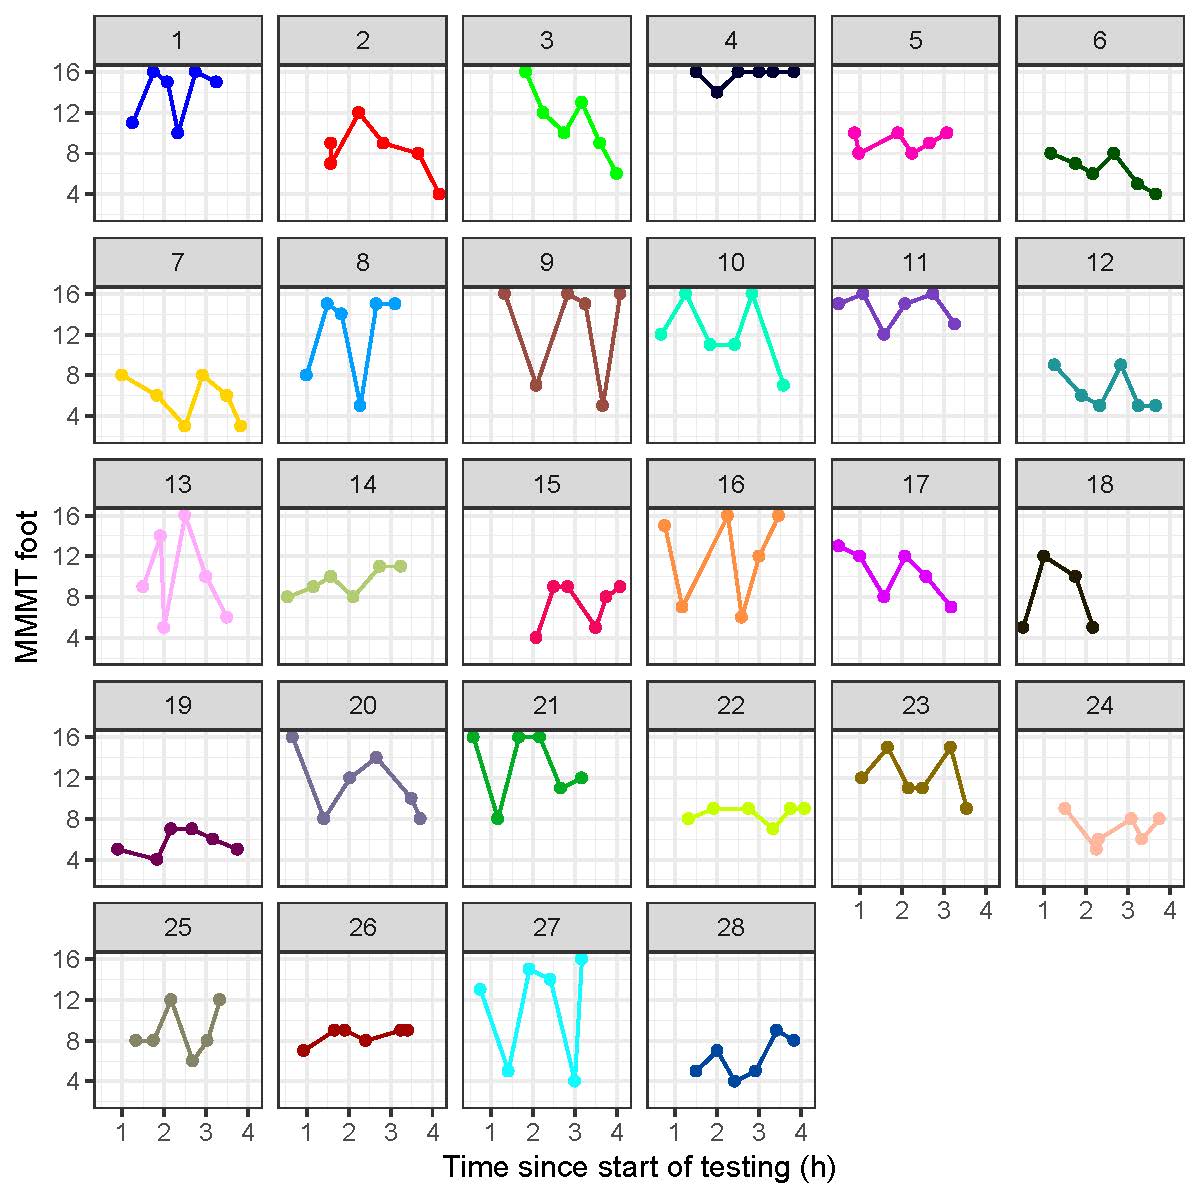


**Fig. 4.** Relationship between modified Manual Muscle Test (mMMT) foot score and testing time, i.e., time since start of testing (h). Each Plot represents one patient.
