# Supplementary material for: The reliability of the modified Manual Muscle Test for persons with MS
Source: Research Square preprint supplement (doi:10.21203/rs.3.rs-7576603/v1), 2025-11-04
Supplement: Supplementary file 3 [file a04ddb9007c8e8a1dc69e4d3.docx]

**Appendix B List recruiting institutes and rater**

**Recruiting institutes**

- University Hospital Basel
- University Hospital for Geriatric Medicine and Rehabilitation Felix Platter, Basel
- Physiotherapy Praxis Claragraben, Basel
- Physiotherapy Davies, Basel
- Physiotherapy Oase, Basel
- Physiotherapy Ars movendi, Basel
- Physiotherapy Langmatten, Binningen, Baselland
- Neurophysio Biland/Kestenholz, Gelterkinden, Baselland
- Physiotherapy Dreilinden, Oberwil, Baselland
- Physiotherapy Aumatt, Reinach, Baselland
- Physiotherapy Imhof, Lausen, Baselland

**Rater mMMT**

- 3 Medical specialist in neurology (neurological polyclinic, University Hospital Basel, Basel, Switzerland): Dr. MD. Nuria Alicia Cerda Fuertes, Dr. Johanna Oechtering, Dr. Riccardo Galbusera).
- 3 Physiotherapists specialized in MS (CAS MS-therapist, Universität Basel, Switzerland)
- Wabun Kitzdörfer, Physiotherapy Langmatten, Binningen, Baselland
- Ursula Biland-Thommen, MSc. and Carmen Kestenholz, Neurophysio Biland/Kestenholz, Gelterkinden, Baselland
