# Supplementary material for: The reliability of the modified Manual Muscle Test for persons with MS
Source: Research Square preprint supplement (doi:10.21203/rs.3.rs-7576603/v1), 2025-11-04
Supplement: Supplementary file 4 [file d3f3a2e0b43ddf2731da467a.docx]

**Appendix C Sample size calculations**

The sample size was estimated to show that the mMMT results in a clinically relevant intraclass correlation coefficient (ICC) > 0.70.

Using a resampling approach, we simulated synthetic data sets of various sample sizes from a multivariate standard normal distribution with a correlation of 0.89 (0.87 plus a correction factor of 0.02) for three raters. Using Gaussian copula, these normally distributed samples were transformed into uniformly distributed samples and rounded up to obtain integers from 1–7 (corresponding to the ranks of the mMMT ordinal categories). This process resulted in sample data with an expected ICC of 0.87.

For these samples, the ICC with a 95% CI was determined using a two-way random effects ANOVA with both patients and raters as random effects, measuring the consistency between the raters. Single ratings and non-averaged ratings were considered. It was subsequently tested whether the lower limit of the 95% CI exceeded the ICC margin of 0.70.

Assuming a drop-out rate of 10%, a total of 28 patients were needed to show that the ICC exceeds 0.70 with a power of at least 80%.
