# Supplementary material for: The reliability of the modified Manual Muscle Test for persons with MS
Source: Research Square preprint supplement (doi:10.21203/rs.3.rs-7576603/v1), 2025-11-04
Supplement: Supplementary file 5 [file f3b6fe3bc2cb8427fdd040e7.docx]

**Appendix A Test criteria and rating for the dorsiflexion of the foot**

**Test position**

- The pwMS sits on the treatment couch with hips in 70-degree flexion.
- The pelvis is in the most possible upright position.
- The arms are propped up on the treatment couch beside the torso.
- The feet are positioned hip-wideth apart. The sole of the foot that is not tested is positioned flat on the floor with the heel directly under the knee. The tested foot is positioned with the most dorsal area of the heel at the same height as the first metatarsophalangeal of the other foot.

**Control criteria**

- The positions of the pelvis, the untested foot, and the tested knee remain exactly the same.
- Criteria of the tested leg:
  - - - - Supination of the foot that cannot be actively corrected is not allowed.
        - The heel is always in contact with the floor and does not move forward.
        - Flexion and extension of the toes that cannot be corrected are not allowed.
        - The knee remains in the same position, and movement of the hip in abduction and adduction is not allowed.

**Rating criteria**

mMMT 2+ The foot is positioned passively to the neutral position in the upper ankle joint (90 degrees) and releases slowly from the neutral position downwards.

mMMT 3- The foot is positioned passively in the neutral position in the upper ankle joint (90 degrees) and can be kept in the neutral position for 3 seconds.

mMMT 3 The foot is positioned passively in maximal dorsiflexion of the upper ankle joint and can be kept in this position for 3 seconds.

mMMT 3+ The foot is positioned passively in maximal dorsiflexion of the upper ankle joint and can keep this position against slight resistance for 1 second.

mMMT 4 The foot is positioned passively in maximal dorsiflexion of the upper ankle joint and can keep this position against moderate resistance for 1 second.

mMMT 4+ The foot is positioned passively in maximal dorsiflexion of the upper ankle joint and can keep this position against strong resistance for 1 second.

mMMT 5 The foot is positioned passively in maximal dorsiflexion of the upper ankle joint and can keep this position against maximum resistance for 1 second.
